# Supplementary material for: Dietary Sources of Salt in Low- and Middle-Income Countries: A Systematic Literature Review
Source: Int J Environ Res Public Health. 2019 Jun 12;16(12):2082. doi: 10.3390/ijerph16122082 (PMC6617282; doi:10.3390/ijerph16122082)
Supplement: Supplementary file 1 [file ijerph-16-02082-s001.pdf]

**Table S1.** Search strategy.

| Searches       | Search Terms                                                                                                                                                                                                                                                                                                                                                                                                                                                                                                                                                                                                                                                                                                                                                                                                                                                                                                                                                                                                                                                                                                                                                                                    |
|----------------|-------------------------------------------------------------------------------------------------------------------------------------------------------------------------------------------------------------------------------------------------------------------------------------------------------------------------------------------------------------------------------------------------------------------------------------------------------------------------------------------------------------------------------------------------------------------------------------------------------------------------------------------------------------------------------------------------------------------------------------------------------------------------------------------------------------------------------------------------------------------------------------------------------------------------------------------------------------------------------------------------------------------------------------------------------------------------------------------------------------------------------------------------------------------------------------------------|
| Medline        | "source of salt" OR "dietary salt" OR "discretionary salt" OR "salt intake" OR "salt in food" OR "salt added at the table" OR "dietary sources of sodium" AND "Algeria" OR "Angola" OR "Benin" OR "Botswana" OR "Burkina Faso" OR "Burundi" OR "Cameroon" OR "Cape Verde" OR "Central African Republic" OR "Chad" OR "Democratic Republic of Congo" OR "Republic of Congo" OR "Cote d'Ivoire" OR "Equatorial Guinea" OR "Ethiopia" OR "Gabon" OR "Gambia" OR "Ghana" OR "Guinea" OR "Guinea Bissau" OR "Kenya" OR "Lesotho" OR "Liberia" OR "Madagascar" OR "Malawi" OR "Mauritius" OR "Mozambique" OR "Namibia" OR "Nigeria" OR "Reunion" OR "Rwanda" OR "Sao Tome and Principe" OR "Senegal" OR "Seychelles" OR "Sierra Leone" OR "South Africa" OR "Swaziland" OR "Tanzania" OR "Togo"                                                                                                                                                                                                                                                                                                                                                                                                       |
| Scopus         | OR "Uganda" OR "Zambia" OR "Zimbabwe" OR "Afghanistan" OR "Albania" OR "American Samoa" OR "Armenia" OR "Azerbaijan" OR "Bangladesh" OR "Belarus"                                                                                                                                                                                                                                                                                                                                                                                                                                                                                                                                                                                                                                                                                                                                                                                                                                                                                                                                                                                                                                               |
| Web of Science | OR "Belize" OR "Bhutan" OR "Bolivia" OR "Bosnia and Herzegovina" OR "Brazil" OR "Bulgaria" OR "Cambodia" OR "China" OR "Colombia" OR "Comoros" OR "Costa Rica" OR "Cuba" OR "Macedonia" OR "Malaysia" OR "Maldives" OR "Marshall Islands" OR "Mexico" OR "Micronesia, Fed. Sts." OR "Moldova" OR "Mongolia" OR "Montenegro" OR "Myanmar" OR "Nepal" OR "Nicaragua" OR "Pakistan" OR "Palau" OR "Panama" OR "Papua New Guinea" OR "Paraguay" OR "Peru" OR "Philippines" OR "Romania" OR "Rwanda" OR "Samoa" OR "Dominica" OR "Dominican Republic" OR "Ecuador" OR "Serbia" OR "El Salvador" OR "Solomon Islands" OR "Fiji" OR "Sri Lanka" OR "St. Lucia" OR "Georgia" OR "St. Vincent and the Grenadines" OR "Grenada" OR "Suriname" OR "Guatemala" OR "Syria" OR "Tajikistan" OR "Guyana" OR "Haiti" OR "Thailand" OR "Honduras" OR "Timor-Leste" OR "India" OR "Indonesia" OR "Tonga" OR "Iran" OR "Iraq" OR "Turkey" OR "Jamaica" OR "Turkmenistan" OR "Jordan" OR "Tuvalu" OR "Kazakhstan" OR "Ukraine" OR "Kiribati" OR "Uzbekistan" OR "Korea, Dem. People's Rep." OR "Vanuatu" OR "Kosovo" OR "Vietnam" OR "Kyrgyz Republic" OR "West Bank and Gaza" OR "Lao PDR" OR "Yemen" OR "Lebanon" |

**Table S2.** Risk of bias assessment.

| Included Studies                        | Were the Aims/Objectives of the Study Clear? | Was the Design Appropriate for the Aim(s) Stated? | Was the Sample Size Justified? | Was the Target Population Clearly Defined? | Was the Sample Taken From an Appropriate Population Base? | Was the Selection Process Able to Select a Representative Sample? | Were Measures Undertaken to Address And Categorize Non-Respondents? | Were Risk Factors and Outcome Measured Appropriate to the Aims of the Study | Is it Clear What Was Used to Determine Statistical or Precision Estimates? |
|-----------------------------------------|----------------------------------------------|---------------------------------------------------|--------------------------------|--------------------------------------------|-----------------------------------------------------------|-------------------------------------------------------------------|---------------------------------------------------------------------|-----------------------------------------------------------------------------|----------------------------------------------------------------------------|
| Kerry et al., 2005                      | Yes                                          | Yes                                               | No                             | Yes                                        | Yes                                                       | Yes                                                               | Yes                                                                 | Yes                                                                         | Yes                                                                        |
| Ferrante et al., 2011                   | Yes                                          | Yes                                               | No                             | Yes                                        | Yes                                                       | No                                                                | Yes                                                                 | Yes                                                                         | Yes                                                                        |
| Charlton et al., 2005                   | Yes                                          | Yes                                               | No                             | Yes                                        | Yes                                                       | No                                                                | No                                                                  | Yes                                                                         | Yes                                                                        |
| Liu et al., 2014                        | Yes                                          | Yes                                               | No                             | Yes                                        | Yes                                                       | No                                                                | Yes                                                                 | Yes                                                                         | Yes                                                                        |
| Zhao et al., 2015                       | Yes                                          | Yes                                               | No                             | Yes                                        | Yes                                                       | No                                                                | No                                                                  | Yes                                                                         | Yes                                                                        |
| Health Promotion Board, Singapore, 2011 | Yes                                          | Yes                                               | No                             | Yes                                        | Yes                                                       | Yes                                                               | Yes                                                                 | Yes                                                                         | Yes                                                                        |
| Du et al., 2014                         | Yes                                          | Yes                                               | No                             | Yes                                        | Yes                                                       | Yes                                                               | Yes                                                                 | Yes                                                                         | Yes                                                                        |
| de Moura Souza, 2013                    | Yes                                          | Yes                                               | No                             | Yes                                        | Yes                                                       | Yes                                                               | Yes                                                                 | Yes                                                                         | Yes                                                                        |
| Anderson et al., 2010                   | Yes                                          | Yes                                               | No                             | Yes                                        | Yes                                                       | No                                                                | Yes                                                                 | Yes                                                                         | Yes                                                                        |

**Table S3.** Included articles and their regions of origin.

| Reference                         | Country            | Data Collection Period          | Study Emphasis      | Study Design                         |
|-----------------------------------|--------------------|---------------------------------|---------------------|--------------------------------------|
| <b>Americas</b>                   |                    |                                 |                     |                                      |
| Ferrante et al., 2011 [40]        | Argentina          | 2006 and 2007                   | Product Reformation | Descriptive                          |
| De Moura Souza et al., 2013 [48]  | Brazil             | 2008–2009                       | Dietary Behaviour   | Descriptive                          |
| <b>Western Pacific</b>            |                    |                                 |                     |                                      |
| Liu et al., 2014 [51]             | China              | April to Dec, 2011              | Dietary Behaviour   | Descriptive                          |
| Du et al., 2014 [53]              | China              | 1991 to 2009                    | Dietary Behaviour   | Descriptive                          |
| Anderson et al., 2010 [55]        | China              | 1996–1999                       | Dietary Behaviour   | Descriptive                          |
| Zhao et al., 2015 [49]            | China              | 2011                            | Dietary Behaviour   | Descriptive                          |
| <b>South East Asia</b>            |                    |                                 |                     |                                      |
| Khan et al., 2011 [54]            | Bangladesh         | October 2009 through March 2010 | Dietary Behaviour   | Descriptive                          |
| Health Promotion Board, 2011 [52] | Singapore          | Not reported                    | Dietary Behaviour   | Descriptive                          |
| <b>Eastern Mediterranean</b>      |                    |                                 |                     |                                      |
| Hussain & Tahruri, 2016 [42]      | Jordan             | Not reported                    | Product Reformation | Descriptive                          |
| Zibaeenezhad et al., 2010 [43]    | Iran               | Not reported                    | Product Reformation | Descriptive                          |
| <b>Europe</b>                     |                    |                                 |                     |                                      |
| Vukic et al., 2013 [45]           | Bosnia Herzegovina | Not reported                    | Product Reformation | Descriptive                          |
| <b>Africa</b>                     |                    |                                 |                     |                                      |
| Silva et al., 2015 [41]           | Mozambique         | June, 2012                      | Product Reformation | Descriptive (Cross sectional)        |
| Charlton et al., 2005 [50]        | South Africa       | Not reported                    | Dietary Behaviour   | Descriptive (Cross sectional)        |
| Kerry, 2005 [58]                  | Ghana              | June 2001 and June 2002         | Dietary Behaviour   | Cluster randomized, controlled trial |
| Nwanguma, 2013 [36]               | Nigeria            | Not reported                    | Product Reformation | Descriptive (Cross sectional)        |
